# Supplementary material
Source: PubMed Central journal article supplement (PMC5508984)
Supplement: NIHMS864073-supplement-Supplementary_Information.pdf [file NIHMS864073-supplement-Supplementary_Information.pdf]

## Supporting information

# Site-specific mapping of sialic acid linkage isomers by ion mobility spectrometry

Miklos Guttman\*, Kelly K. Lee

Department of Medicinal Chemistry; University of Washington, Seattle, WA 98195

\*Correspondence: mguttman@uw.edu

### Contents:

Table S1: Pattern of sialic acid linkages in  $\alpha$ 1AGP and Fetuin glycopeptides

Figure S1: HILIC purification of 3' and 6' sialyl-N-acetyllactosamine

Figure S2: ATDs of SLN at different collision energies, the protonated, and the sodiated species.

Figure S3: Sialyl-N-acetyllactosamine fragments from  $\alpha$ 1AGP and Fetuin glycopeptides

Figure S4: Extracted ion chromatograms of glycopeptides after treatment with sialidases

Figure S5: Effect of the collision energy (CE) on the observed sialylation linkage by IMS

**Table S1:** Pattern of sialic acid linkages in  $\alpha$ 1AGP (top) and Fetuin (bottom)

## glycopeptides

| Peptide                                              | Glycan                                                  | $\alpha$ 2-6 | $\alpha$ 2-3 |                     |
|------------------------------------------------------|---------------------------------------------------------|--------------|--------------|---------------------|
| NEEYNK<br>(34-39)                                    | Hex <sub>5</sub> HexNAc <sub>4</sub> NeuAc <sub>2</sub> | 94.9%        | 5.1%         |                     |
|                                                      | Hex <sub>6</sub> HexNAc <sub>5</sub> NeuAc <sub>3</sub> | 77.7%        | 22.3%        |                     |
| ENGTISR<br>(84-90)                                   | Hex <sub>5</sub> HexNAc <sub>4</sub> NeuAc <sub>2</sub> | 86.6%        | 13.4%        |                     |
|                                                      | Hex <sub>6</sub> HexNAc <sub>5</sub> NeuAc <sub>3</sub> | 65.9%        | 34.1%        |                     |
|                                                      | Hex <sub>7</sub> HexNAc <sub>6</sub> NeuAc <sub>4</sub> | 39.5%        | 60.5%        |                     |
| QDQCIYNTTYLNVQR<br>(69-83)                           | Hex <sub>5</sub> HexNAc <sub>4</sub> NeuAc <sub>2</sub> | 76.4%        | 23.6%        |                     |
|                                                      | Hex <sub>6</sub> HexNAc <sub>5</sub> NeuAc <sub>3</sub> | 79.8%        | 20.2%        |                     |
|                                                      | Hex <sub>7</sub> HexNAc <sub>6</sub> NeuAc <sub>4</sub> | 42.9%        | 57.1%        |                     |
| LVPVPITNATLDR<br>(8-20)                              | Hex <sub>5</sub> HexNAc <sub>4</sub> NeuAc <sub>2</sub> | 86.3%        | 13.7%        |                     |
|                                                      | Hex <sub>6</sub> HexNAc <sub>5</sub> NeuAc <sub>3</sub> | 73.6%        | 26.4%        |                     |
| YFTPKNKTEDTIFLR<br>(50-63)                           | Hex <sub>5</sub> HexNAc <sub>4</sub> NeuAc <sub>2</sub> | 95.7%        | 4.3%         |                     |
|                                                      | Hex <sub>6</sub> HexNAc <sub>5</sub> NeuAc <sub>3</sub> | 76.8%        | 23.2%        |                     |
|                                                      | Hex <sub>7</sub> HexNAc <sub>6</sub> NeuAc <sub>4</sub> | 40.6%        | 59.4%        |                     |
| LVPVPITNATLDQITGK<br>(8-24)                          | Hex <sub>5</sub> HexNAc <sub>4</sub> NeuAc <sub>2</sub> | 89.6%        | 10.4%        |                     |
|                                                      | Hex <sub>6</sub> HexNAc <sub>5</sub> NeuAc <sub>3</sub> | 82.0%        | 18.0%        |                     |
| Peptide                                              | Glycan                                                  | $\alpha$ 2-6 | $\alpha$ 2-3 | $\alpha$ 2-6-GlcNAc |
| LCPDCPLLAPLNDLR<br>(127-141)                         | Hex <sub>5</sub> HexNAc <sub>4</sub> NeuAc <sub>2</sub> | 71.1%        | 28.9%        | 0.0%                |
|                                                      | Hex <sub>6</sub> HexNAc <sub>5</sub> NeuAc <sub>3</sub> | 54.5%        | 45.5%        | 0.0%                |
|                                                      | Hex <sub>6</sub> HexNAc <sub>5</sub> NeuAc <sub>4</sub> | 78.4%        | 18.1%        | 3.5%                |
| VVHAVEVALATFNAE...<br>...SNGSYLQLVEISR<br>(142-169)  | Hex <sub>5</sub> HexNAc <sub>4</sub> NeuAc <sub>2</sub> | 58.7%        | 41.3%        | 0.0%                |
|                                                      | Hex <sub>6</sub> HexNAc <sub>5</sub> NeuAc <sub>3</sub> | 54.2%        | 45.2%        | 0.6%                |
|                                                      | Hex <sub>6</sub> HexNAc <sub>5</sub> NeuAc <sub>4</sub> | 72.8%        | 22.0%        | 5.2%                |
| RPTGEVYDIEIDTLETT...<br>...CHVLDPTLANCSVR<br>(54-85) | Hex <sub>5</sub> HexNAc <sub>4</sub> NeuAc <sub>2</sub> | 76.8%        | 23.2%        | 0.0%                |
|                                                      | Hex <sub>6</sub> HexNAc <sub>5</sub> NeuAc <sub>3</sub> | 55.5%        | 44.5%        | 0.0%                |
|                                                      | Hex <sub>6</sub> HexNAc <sub>5</sub> NeuAc <sub>4</sub> | 76.6%        | 18.7%        | 4.6%                |

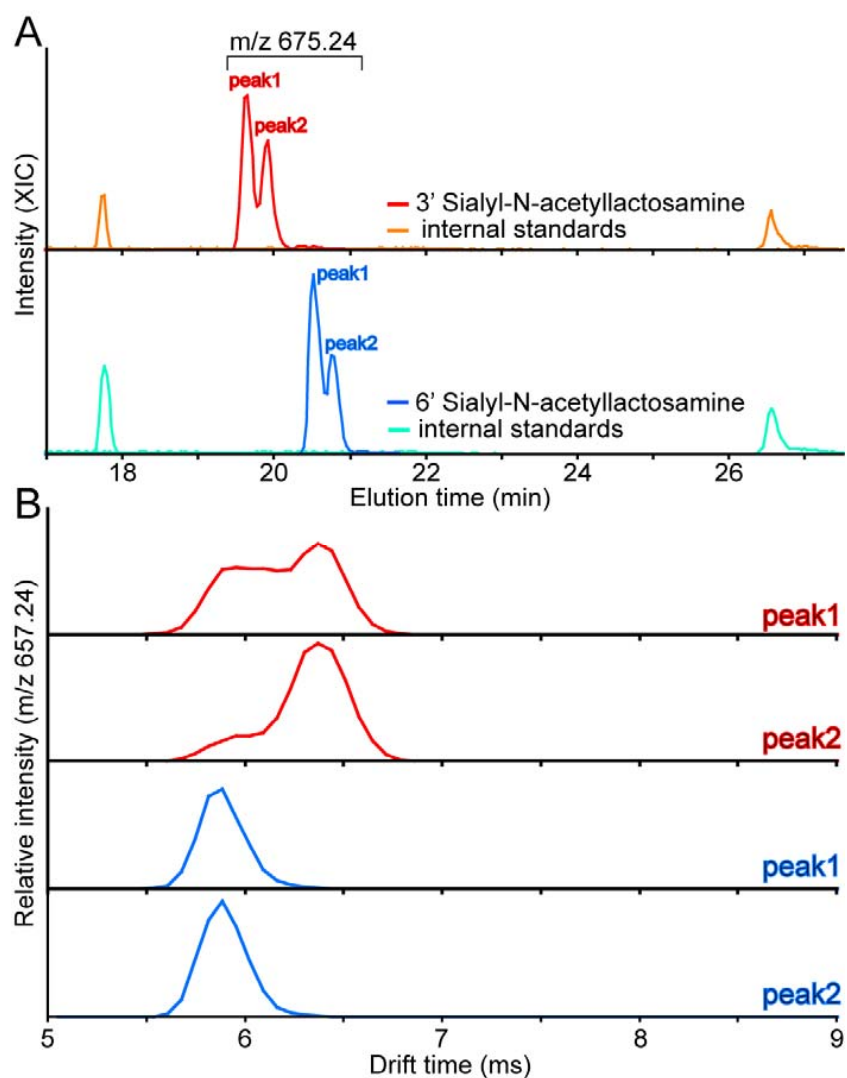

**Figure S1:** HILIC purification of 3' and 6' sialyl-N-acetyllactosamine (NeuAc-Gal-GlcNAc). **A)** The elution of each species was monitored for the protonated precursor ion at m/z 675.24. The doublet peaks for each species is due to separation of the  $\alpha/\beta$  anomers. Internal standards (cyan and orange traces) were used to ensure that elution conditions were reproducible between the two LC runs. **B)** The ion mobility arrival time distributions for each eluting peak of the  $[M-H_2O+H]^+$  in source decay fragment (m/z 657.24) are shown for 3' (red) and 6' (blue) sialyl-N-acetyllactosamine.

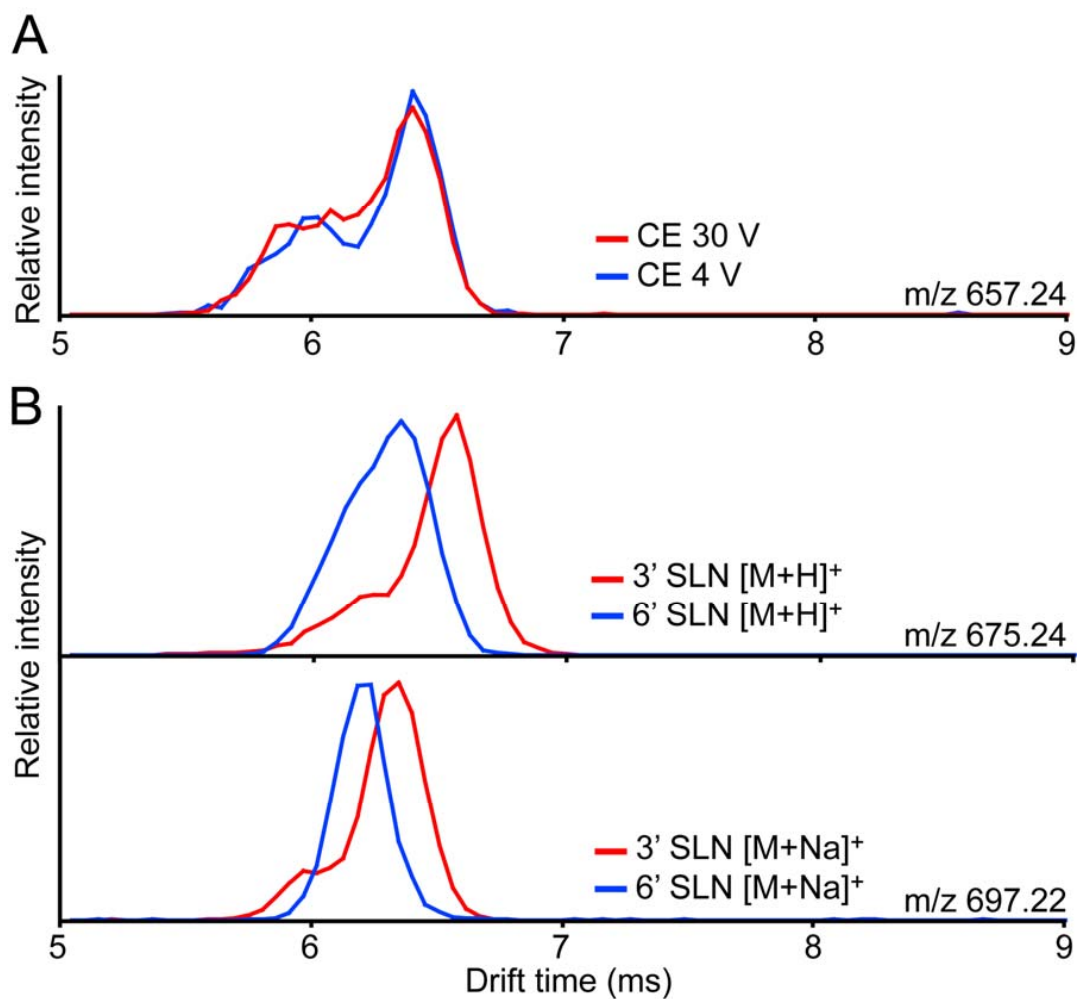

**Figure S2:** **A**) ATD of 3' SLN [M-H<sub>2</sub>O+H]<sup>+</sup> fragment at a collision energy of 4 V (blue) or 30 V (red). **B**) ATD of the intact protonated (top) and sodium adduct [M+Na]<sup>+</sup> (bottom) of 3' SLN (red) and 6' SLN (blue). The broadened peaks for the protonated species likely arise from both the  $\alpha/\beta$  anomers that are present in solution.

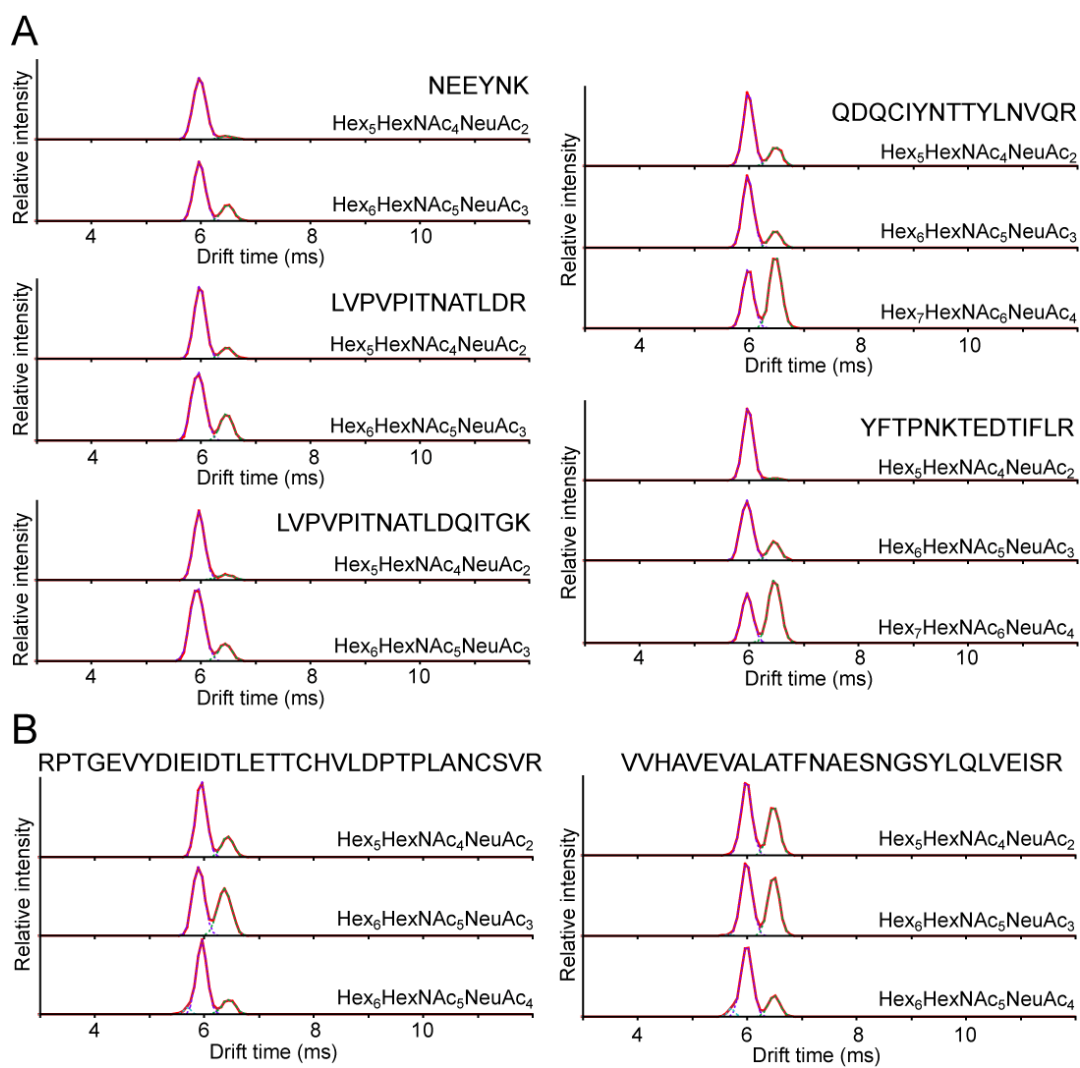

**Figure S3:** ATDs of siayl-N-acetylactosamine fragments ( $m/z$  657.24) from  $\alpha$ 1AGP (**A**) and Fetuin (**B**) glycopeptides. Dashed lines show Gaussian fits used to quantify the each peak, and the results are summarized in table S1. Glycan compositions are indicated in each panel.

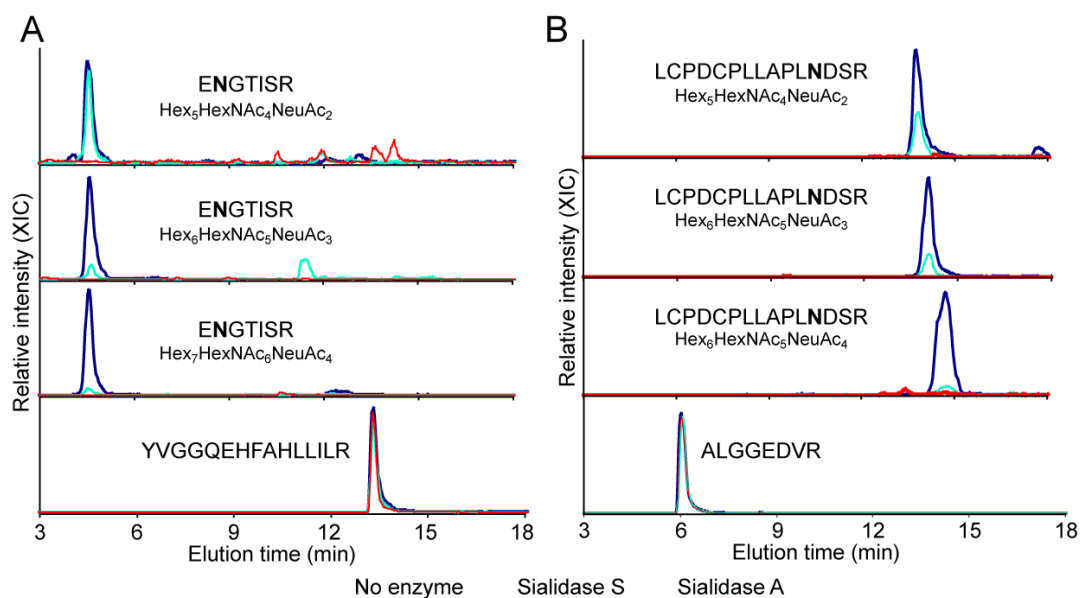

**Figure S4:** Extracted ion chromatograms of glycopeptides after treatment with sialidases.

**A)** Ion chromatogram for  $\alpha$ 1AGP glycopeptide with a biantennary bisialo (1<sup>st</sup> panel), triantennary trisialo (2<sup>nd</sup> panel) and tetraantennary tetrasialo (3<sup>rd</sup> panel) glycan is shown before any sialidase treatment (blue), after sialidase S treatment (cyan) to cleave  $\alpha$ 2-3 sialic acids, and sialidase A treatment to cleave both  $\alpha$ 2-3 and  $\alpha$ 2-6 sialic acids (red). **B)** Ion chromatogram traces for Fetuin glycopeptide with a biantennary bisialo (1<sup>st</sup> panel), triantennary trisialo (2<sup>nd</sup> panel) or triantennary tetrasialo (3<sup>rd</sup> panel) glycan after sialidase treatments. The last panels show the intensity of a non glycosylated tryptic peptide, which indicate that the overall signals are comparable.

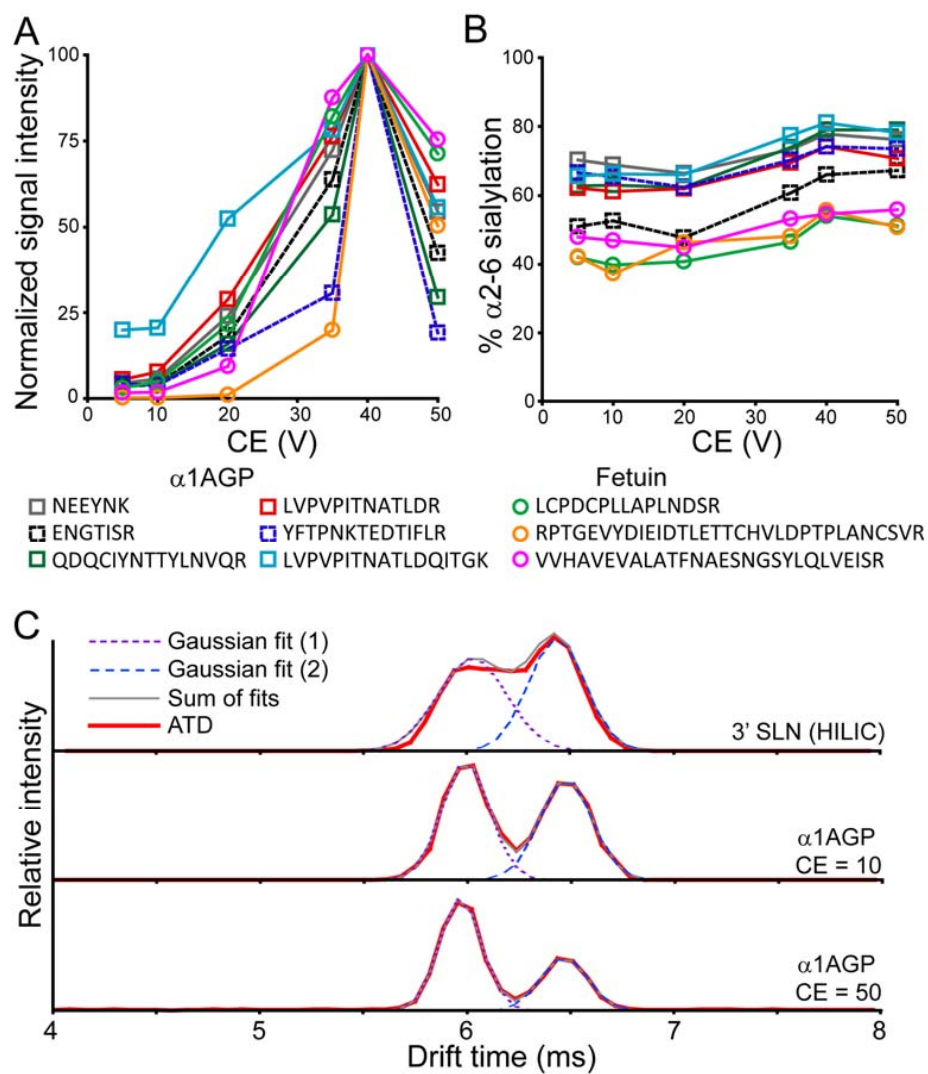

**Figure S5:** Effect of the collision energy (CE) on the observed sialylation linkage by IMS. **A)** Normalized signal intensity for the SLN fragment ( $m/z$  657.24) as a function of collision energy from 5 V up to 50 V from  $\alpha$ 1AGP (squares) and Fetuin (circles) peptides with triantennary trisialo glycans. **B)** The percentage of  $\alpha$ 2-6 sialylation based on the relative intensities of the 3' and 6' SLN fragments at different collision CE energies. **C)** Gaussian fits to the ATD ( $m/z$  657.24) of the first peak of 3' SLN standard during HILIC purification (top), and from the triantennary trisialo  $\alpha$ 1AGP glycopeptide (residues 84-90) at a collision energy of 10 V (middle) or 50 V (bottom).
